# Supplementary material for: Insights into the mechanical stability of tetrahydrofuran hydrates from experimental, machine learning, and molecular dynamics perspectives
Source: Royal Society of Chemistry journal article supplement (doi:10.1039/d3nr04940j), 2024-01-01
Supplement: d3nr04940j1.pdf [file d3nr04940j1.pdf]

## Supplementary Information for

### **Insights into the Mechanical Stability of Tetrahydrofuran Hydrates from Experimental, Machine Learning, and Molecular Dynamics Perspectives**

#### **Characterizations**

X-ray diffraction (XRD) patterns were measured by a Bruker D8 ADVANCE X-ray diffractometer using Cu K $\alpha$  radiation. The data were collected at ambient temperature from  $2\theta$  values between 5.0 and 50.0° at a continuous scan rate of 11.0°/min, with a revolution period of 5 min. As shown in Figure S1, the characteristic peaks of ice at 22.7°, 24.1° and 25.8°, correspond to the (100), (002) and (101) planes. These characteristic peaks sharply decrease in the diffractograms for the M1-3 samples.

The mesoscopic structure of THF hydrates with different ice contents are carried out by X-ray microscope/micrometer microcomputed tomography (CT) equipment which the equipment model is Xradia 610.

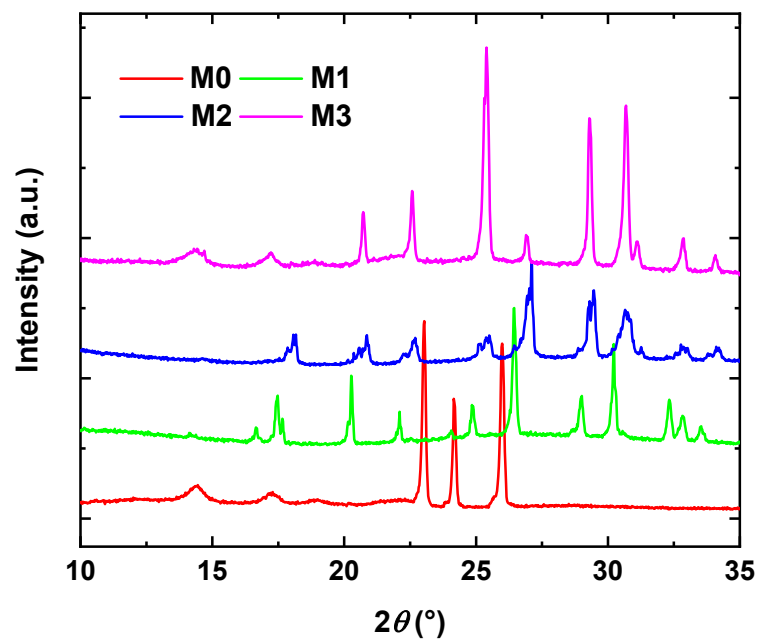

**Figure S1** XRD diffractogram of the M0-3 samples.

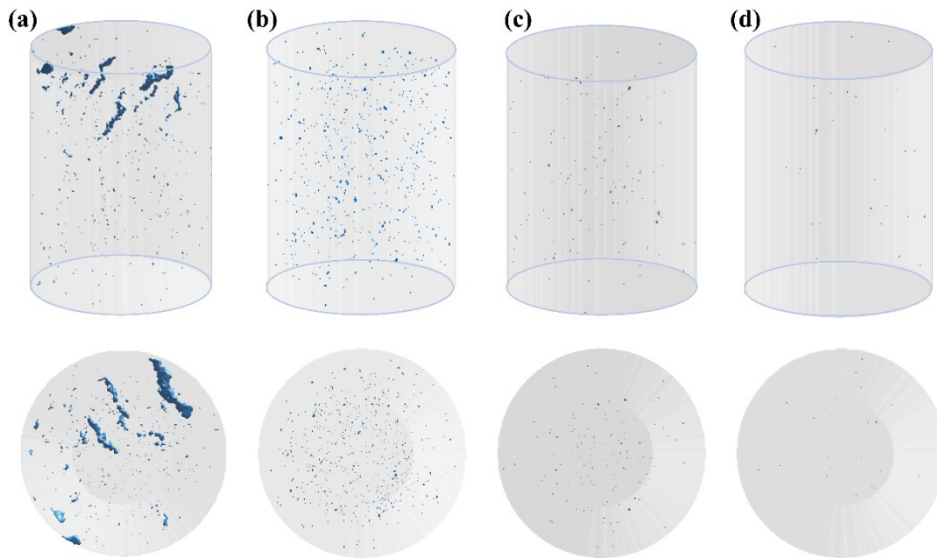

**Figure S2** The 3D images of (a) M0, (b) M1, (c) M2 and (d) M3 samples obtained by the computed tomography (CT) technology at  $-20^{\circ}\text{C}$ . The pore size of the samples increases with increasing ice content.

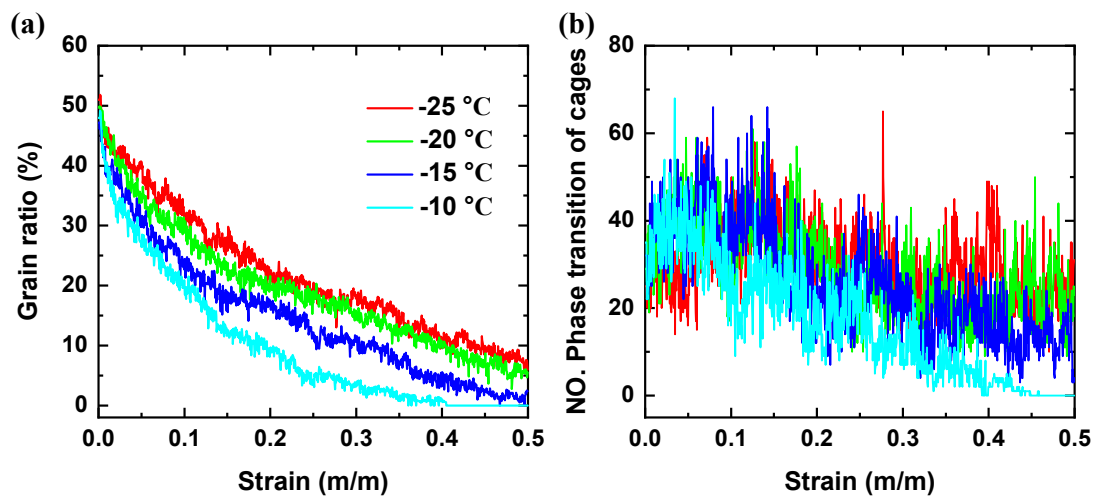

**Figure S3** (a) Variations of the ratios of the hydrate grains occupancy in system with strain under different temperatures. (b) Phase transition of the  $5^{12}$  and  $5^{12}6^4$  clathrate cages from sII hydrate grains to the GBs during compressive process.

**Table S1** The number of times transformation between  $5^{12}/5^{12}6^4$  and other cages during the compressive tests.

| Temperatures/Cage transformation     | 248 K | 253 K | 258 K | 263 K |
|--------------------------------------|-------|-------|-------|-------|
| $5^{12} \rightarrow 4^25^86^1$       | 23    | 14    | 15    | 11    |
| $5^{12} \rightarrow 4^25^86^2$       | 9     | 11    | 4     | 10    |
| $5^{12} \rightarrow 4^15^{10}6^2$    | 2     | 1     | 4     | 4     |
| $4^25^86^1 \rightarrow 5^{12}$       | 13    | 4     | 14    | 9     |
| $4^25^86^2 \rightarrow 5^{12}$       | 5     | --    | 4     | 6     |
| $4^15^{10}6^2 \rightarrow 5^{12}$    | 3     | 2     | 4     | --    |
| $5^{12}6^4 \rightarrow 4^15^{10}6^5$ | 6     | 6     | 4     | 4     |
| $5^{12}6^4 \rightarrow 4^15^{10}6^6$ | 1     | 2     | --    | 3     |
| $4^15^{10}6^5 \rightarrow 5^{12}6^4$ | 8     | 3     | 2     | 2     |
| $4^15^{10}6^6 \rightarrow 5^{12}6^4$ | --    | 1     | 1     | 1     |
